# Supplementary material
Source: Research Square preprint supplement (doi:10.21203/rs.3.rs-8902646/v1)
Supplement: Supplementary file 1 [file 3d2dc626f6e0652e91e1dfc1.docx]

**FOCUS GROUP PROTOCOL**

**SECTION 1. Moderator 1: First, we’d like to ask you a few questions about your belief in your ability to manage your diabetes OR your diabetes and pain/chronic pain.**

1. **Moderator 2: This question is for everyone;** describe a time when you felt confident in managing a diabetes-related task.

**Examples** include eating healthy, exercising, monitoring your blood sugar, taking medications, or inspecting your feet.

1. **Moderator 1: This question is for people with diabetes and pain or diabetes and chronic pain only;** describe a time when you felt confident in managing your diabetes and pain/chronic pain.

**Probe:** what type of prescribed, over-the-counter, or other strategies did you use to help manage?

**Examples** include Tylenol, Ibuprofen, Advil, Motrin, and Naproxen, Aleve, prescription medications, [such as Opioids], physical therapy [including heat or ice packs, massage, hydrotherapy], psychological therapy [such as cognitive behavioral therapy], pastoral counseling, prayer, relaxation techniques, lifestyle changes [eating nutritious foods, drinking water, getting enough sleep, managing stress], or exercise.

1. **Moderator 3: This question is for everyone;** describe some challenges that made you feel less confident about managing your diabetes. How did you overcome these challenges?
2. **Moderator 1: This question is for people with diabetes and pain or diabetes and chronic pain only;** describe some challenges that made you feel less confident about managing your diabetes and pain/chronic pain. How did you overcome these challenges?

**SECTION 2. Moderator 1: Thank you so much, this is valuable information. Now, I would like to talk about your expected results (positive or negative) when engaging in self-management tasks.**

- 1. **Moderator 2: This question is for everyone**; what are the most important benefits you expect to see when you manage your diabetes well?

**Examples** of benefits for diabetes can be better overall health, increased energy levels, weight management, reduced complications of diabetes.

- 1. **Moderator 1: This question is for people with diabetes and pain or diabetes and chronic pain only;** what are the most important benefits you expect to see when you manage your diabetes and pain/chronic pain well?

**Examples** of benefits for pain/chronic pain can be increased flexibility, better ability to perform daily tasks, reduced physical strain on affected areas.

- 1. **Moderator 1; This question is for people with diabetes and pain or diabetes and chronic pain only;** do you think managing your pain/chronic pain affects your long-term health? If so, describe some positive and negative examples.

**SECTION 3. Moderator 1: Great! Now, I’d like to ask a few questions about how you learned/used experiences from others to manage your diabetes OR your diabetes and pain/chronic pain.**

- 1. **Moderator 3: This question is for everyone;** can you describe a time when you learned new ways to manage your diabetes by watching or talking to someone else with diabetes?
  2. **Moderator 3: Same question for people with diabetes and pain or diabetes and chronic pain only;** can you share a time when you learned new ways to manage your diabetes and pain/chronic pain?

**SECTION 4. Moderator 1: My last few questions to the group will be about your emotional response to managing your diabetes OR your diabetes and pain/chronic pain.**

1. **Moderator 2: This question is for everyone**; do you think your emotions (e.g., stress or frustration) impact your ability to manage your diabetes? If so, describe a time when this happened to you.
2. **Moderator 1: This question is for people with diabetes and pain or diabetes and chronic pain only;** what are some strategies you currently use to cope with living with pain/chronic pain and diabetes?
3. **Moderator 3: This question is for people with diabetes and pain or diabetes and chronic pain only;** can you describe a time when you felt overwhelmed by your pain/chronic pain and diabetes management? What helped you get through this?

**SECTION 5. Moderator 1: Perfect, thank you so much for this rich conversation. My last question is for people living with diabetes and pain/chronic pain;** if we were to develop a program, what skills/knowledge would be helpful to you in managing your diabetes and pain/chronic pain?
